# Supplementary material for: Expansion of orderly stacked metakaolinite layers and order destruction using a kaolinite-tetraphenylphosphonium chloride intercalation compound
Source: PubMed Central journal article supplement (PMC9034375; doi:10.1039/d1ra03926a), 2021-06-30
Supplement: RA-011-D1RA03926A-s001.pdf [file RA-011-D1RA03926A-s001.pdf]

**Electrical Supporting Information**

Expansion of orderly stacked metakaolinite layers and  
order destruction using a kaolinite-tetraphenylphosphonium  
chloride intercalation compound

*Shingo Machida<sup>\*a</sup>, Ken-ichi Katsumata<sup>a</sup>, Atsuo Yasumori<sup>a</sup>*

<sup>a</sup>Department of Material Science and Technology, Faculty of Advanced Engineering, Tokyo University of Science,

6-3-1 Nijuku, Katsushika-ku, Tokyo 125-8585, Japan

\*E-mail: [shingo.machida@rs.tus.ac.jp](mailto:shingo.machida@rs.tus.ac.jp)

Figures

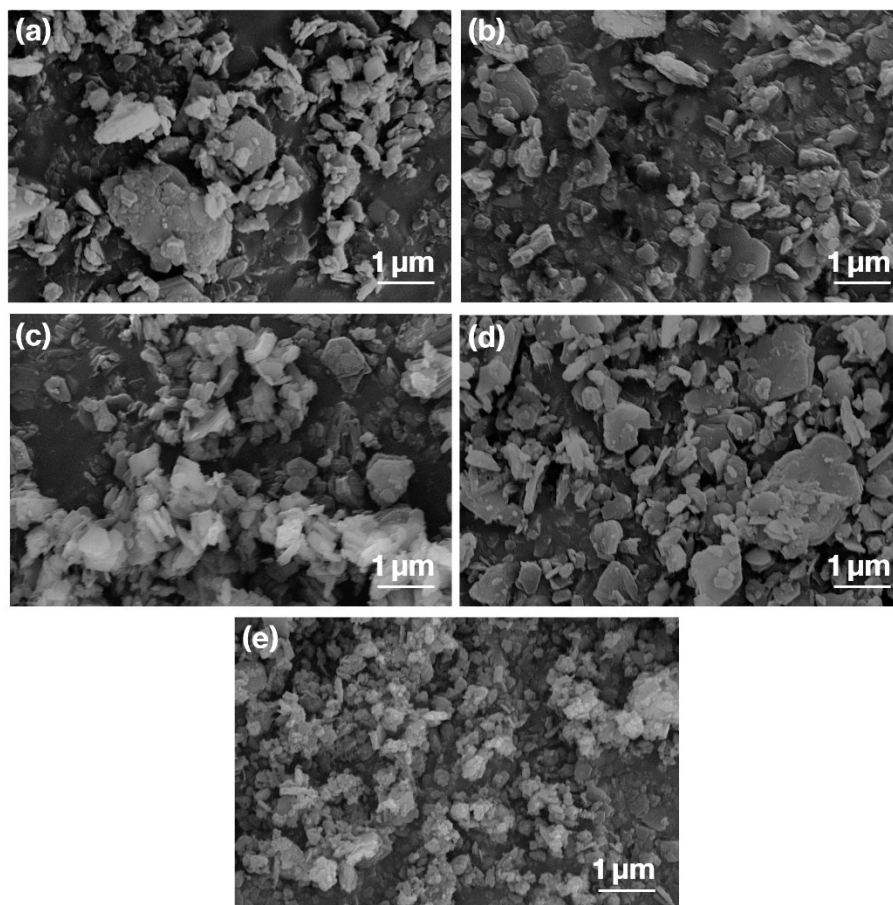

Figure S1. FE-SEM images of (a) kaolinite, (b) MeO-Kaol, (c) TPhPCI/MeO-Kaol, (d) TPhPCI/MeO-Kaol\_540 and (e) TPhPCI/MeO-Kaol\_540\_G.

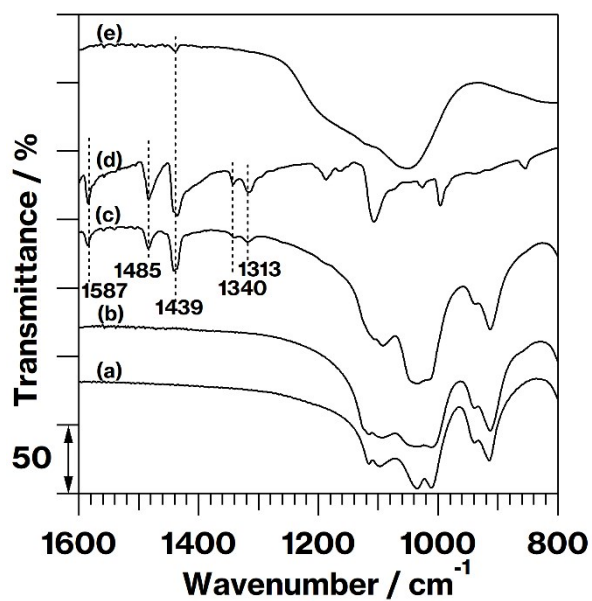

Figure S2. IR spectra in the 1600-400  $\text{cm}^{-1}$  range of (a) kaolinite, (b) MeO-Kaol, (c) TPhPCI/MeO-Kaol, (d) TPhPCI and (e) TPhPCI/MeO-Kaol\_540.

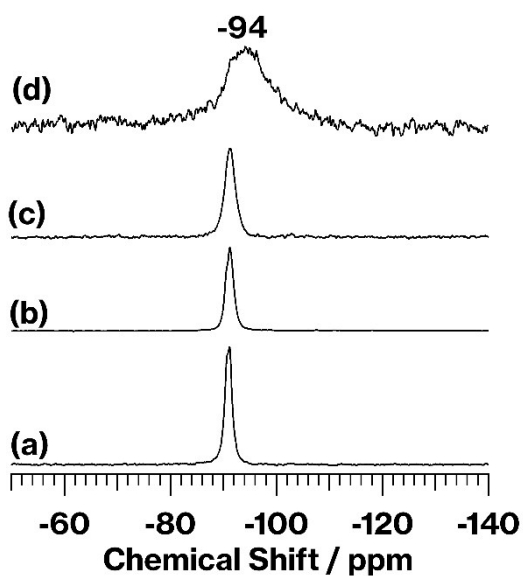

Figure S3.  $^{29}\text{Si}$  CP/MAS NMR spectra of (a) kaolinite, (b) MeO-Kaol, (c) TPhPCI/MeO-Kaol and (d) TPhPCI/MeO-Kaol\_540.
